# Supplementary material for: Motor function and white matter connectivity in children cooled for neonatal encephalopathy
Source: PubMed Central journal article supplement (PMC8578038; doi:10.1016/j.nicl.2021.102872), 2021-11-03
Supplement: mmc1.pdf [file mmc1.pdf]

## Supplementary Materials

| Case            | Control | Metric (case) | Metric (control) | Age  | Sex |
|-----------------|---------|---------------|------------------|------|-----|
| <b>Design</b>   |         |               |                  |      |     |
| 1               | 0       | -7.5          | 0                | 6.75 | 0   |
| 0               | 1       | 0             | 5.47             | 7.25 | 1   |
| ...             |         |               |                  |      |     |
| <b>Contrast</b> |         |               |                  |      |     |
| 0               | 0       | 1             | 1                | 0    | 0   |

Supplementary Table 1: NBS design matrix. The design matrix and contrasts to test for case-control differences in the dependence of a given metric (MABC-2 domain scores) on connectivity, are shown. The metric is demeaned within each group and age and sex are included as covariates.

| Tract  | Cases |               |                 | Controls |               |                 |
|--------|-------|---------------|-----------------|----------|---------------|-----------------|
|        | r     | Uncorrected p | FDR-corrected p | r        | Uncorrected p | FDR-corrected p |
| L ATR  | 0.513 | 0.0032        | 0.0191          | 0.383    | 0.0255        | -               |
| R ATR  | 0.488 | 0.0053        | 0.0191          | 0.394    | 0.0213        | -               |
| L CG   | 0.588 | 0.0005        | 0.0090          | 0.169    | 0.3404        | -               |
| R CG   | 0.382 | 0.0338        | -               | 0.002    | 0.9904        | -               |
| L CH   | 0.541 | 0.0017        | 0.0153          | 0.206    | 0.2434        | -               |
| R CH   | 0.395 | 0.0277        | -               | 0.087    | 0.6262        | -               |
| L CST  | 0.228 | 0.2182        | -               | 0.178    | 0.3146        | -               |
| R CST  | 0.140 | 0.4529        | -               | 0.200    | 0.2566        | -               |
| Fminor | 0.354 | 0.0506        | -               | 0.402    | 0.0184        | -               |
| Fmajor | 0.154 | 0.4095        | -               | 0.215    | 0.2229        | -               |
| L IFOF | 0.445 | 0.0121        | 0.0363          | 0.381    | 0.0261        | -               |
| R IFOF | 0.494 | 0.0047        | 0.0191          | 0.291    | 0.0954        | -               |
| L ILF  | 0.208 | 0.2621        | -               | 0.277    | 0.1128        | -               |
| R ILF  | 0.188 | 0.3123        | -               | 0.105    | 0.5538        | -               |
| L SLF  | 0.352 | 0.0522        | -               | 0.270    | 0.1223        | -               |
| R SLF  | 0.333 | 0.0671        | -               | 0.337    | 0.0538        | -               |
| L UF   | 0.314 | 0.0851        | -               | 0.248    | 0.1581        | -               |
| R UF   | 0.362 | 0.0455        | -               | 0.020    | 0.9112        | -               |

Supplementary Table 2: Tract-level correlations. Partial Pearson correlation coefficients,  $r$ , were measured for cases and controls separately. All uncorrected p-values are shown, as well as all significant FDR-corrected p-values. Abbreviations: L = left hemisphere; R = right hemisphere; ATR = anterior thalamic radiation; CG = cingulate gyrus part of the cingulum; CH = hippocampal part of the cingulum; CST = corticospinal tract; Fminor = forceps minor; Fmajor = forceps major; IFOF = inferior fronto-occipital fasciculus; ILF = inferior longitudinal fasciculus; SLF = superior longitudinal fasciculus; UF = uncinate fasciculus.

| <b>MABC</b> | <b>Balance</b> | <b>Manual Dexterity</b> |
|-------------|----------------|-------------------------|
| L & R RMFG  | L & R RMFG     | L SFG                   |
| L & R SFG   | L & R PTR      | L & R IN                |
| L IN        | L & R IN       | L RMFG                  |
| L POP       | L & R SFG      | L PU                    |
| L CACG      | R TP           | R CA                    |
| L & R PTR   | L & R CMFG     | L CACG                  |
| L & R PU    | L & R RACG     | L IPG                   |
| L ITG       | L LOFG         | L STG                   |
| L MTG       | L POP          | L MTG                   |
| L & R RACG  | L PaCG         | L POP                   |
| L STG       | L SMG          | L TP                    |
| L SMG       |                | R PHIG                  |
| L TP        |                | L BSTS                  |
| L CER       |                | L CMFG                  |
| L BSTS      |                | L LOFG                  |
| L CMFG      |                | L PCAL                  |
| L IPG       |                | L & R CER               |
| L PrCG      |                | R CU                    |
| R AC        |                | R RACG                  |

Supplementary Table 3: Complete list of nodes in each subnetwork. The node label abbreviation is preceded by L or R to indicate left or right hemisphere, respectively. Node label abbreviations are shown in Supplementary Table 3.

|                 |                                       |                    |                                  |
|-----------------|---------------------------------------|--------------------|----------------------------------|
| <b>Frontal</b>  |                                       | <b>Limbic</b>      |                                  |
| CMFG            | Caudal middle frontal gyrus           | AC                 | Accumbens area                   |
| FP              | Frontal pole                          | AM                 | Amygdala                         |
| LOFG            | Lateral orbital frontal gyrus         | CACG               | Caudal anterior cingulate gyrus  |
| MOFG            | Medial orbital frontal gyrus          | HI                 | Hippocampus                      |
| PaCG            | Paracentral gyrus                     | ICG                | Isthmus of the cingulate gyrus   |
| POP             | Pars opercularis                      | IN                 | Insula                           |
| POR             | Pars orbitalis                        | PCG                | Posterior cingulate gyrus        |
| PTR             | Pars triangularis                     | PHIG               | Parahippocampal gyrus            |
| PrCG            | Precentral gyrus                      | RACG               | Rostral anterior cingulate gyrus |
| RMFG            | Rostral middle frontal gyrus          |                    |                                  |
| SFG             | Superior frontal gyrus                |                    |                                  |
| <b>Parietal</b> |                                       | <b>Occipital</b>   |                                  |
| IPG             | Inferior temporal gyrus               | CU                 | Cuneus cortex                    |
| PCU             | Precuneus cortex                      | LG                 | Lingual gyrus                    |
| PoCG            | Postcentral gyrus                     | LOG                | Lateral occipital gyrus          |
| SMG             | Supramarginal gyrus                   | PCAL               | Pericalcarine cortex             |
| SPG             | Superior parietal gyrus               |                    |                                  |
| <b>Temporal</b> |                                       | <b>Subcortical</b> |                                  |
| BSTS            | Banks of the superior temporal sulcus | CA                 | Caudate                          |
| EC              | Entorhinal cortex                     | PA                 | Pallidum                         |
| FG              | Fusiform gyrus                        | PU                 | Putamen                          |
| ITG             | Inferior temporal gyrus               | TH                 | Thalamus                         |
| MTG             | Middle temporal gyrus                 | CER                | Cerebellum                       |
| STG             | Superior temporal gyrus               |                    |                                  |
| TP              | Temporal pole                         |                    |                                  |
| TTG             | Tranverse temporal gyrus              |                    |                                  |

Supplementary Table 4: Node label abbreviations.
